# Supplementary material for: Subdoses of 17DD yellow fever vaccine elicit equivalent virological/immunological kinetics timeline
Source: PubMed Central journal article supplement (PMC4223624; doi:10.1186/1471-2334-14-391), 2014-07-15

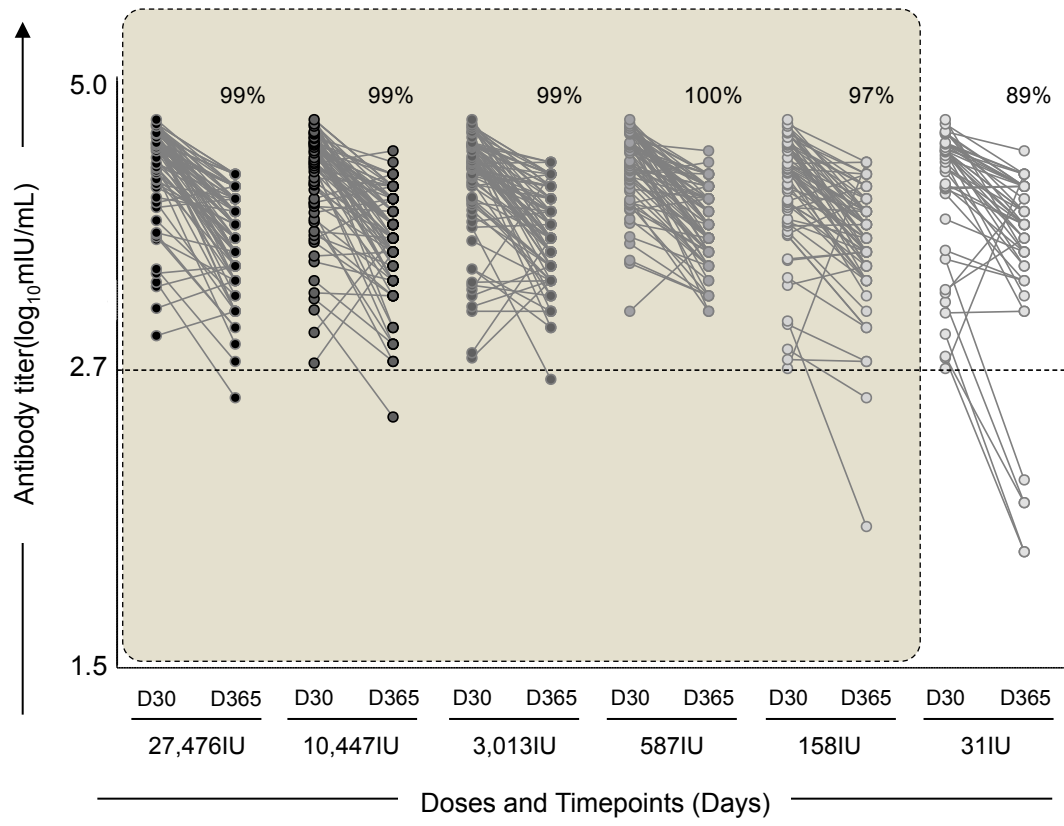

Supplement: 1471-2334-14-391-S1.pdf [file 1471-2334-14-391-S1.pdf]
